# Supplementary material for: From pyramids to peers
Source: Royal Society of Chemistry journal article supplement (doi:10.1039/b509546h), 1991-05-01
Supplement: b509546h-1.pdf [file b509546h-1.pdf]

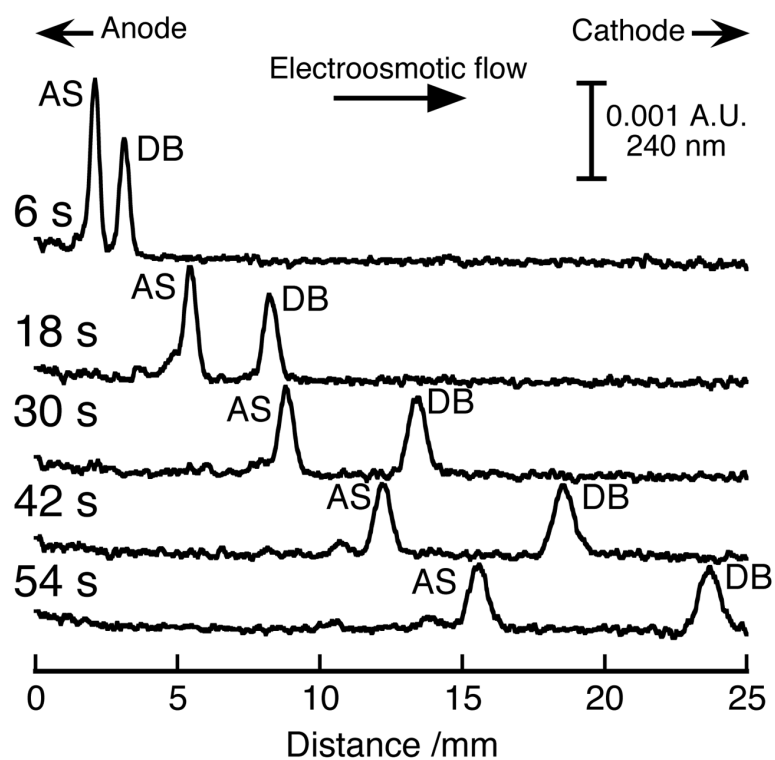

Fig. S1 Electropherograms extracted at intervals of 12 s from a series of electropherograms obtained successively in a single MCE separation run for the sample containing AS and DB.
