# Supplementary material for: From pyramids to peers
Source: Royal Society of Chemistry journal article supplement (doi:10.1039/b509546h), 1991-05-01
Supplement: b509546h-2.pdf [file b509546h-2.pdf]

**Table S1** Plate numbers, N, of AS in various  $t_m$ ,  $W_b$  and  $\sigma$  were base line peak width and standard deviation of the peak.

| $t_m$ / sec | $W_b$ / mm | $\sigma$ / mm <sup>a</sup> | Distance / mm | N <sup>b</sup> |
|-------------|------------|----------------------------|---------------|----------------|
| 6           | 0.92       | 0.23                       | 2.1           | 80             |
| 18          | 1.08       | 0.27                       | 5.3           | 380            |
| 30          | 1.08       | 0.27                       | 8.8           | 1100           |
| 42          | 1.33       | 0.33                       | 12.2          | 1300           |
| 54          | 1.58       | 0.40                       | 15.5          | 1500           |

<sup>a</sup>  $\sigma = W_b / 4$ , <sup>b</sup>  $N = ( \text{Distance} / \sigma )^2$

**Table S2** Plate numbers, N, of DB in various  $t_m$ ,  $W_b$  and  $\sigma$  were base line peak width and standard deviation of the peak.

| $t_m$ / sec | $W_b$ / mm | $\sigma$ / mm <sup>a</sup> | Distance / mm | N <sup>b</sup> |
|-------------|------------|----------------------------|---------------|----------------|
| 6           | 0.83       | 0.21                       | 3             | 200            |
| 18          | 1.08       | 0.27                       | 8.1           | 900            |
| 30          | 1.25       | 0.31                       | 13.3          | 1800           |
| 42          | 1.75       | 0.44                       | 18.6          | 1800           |
| 54          | 1.92       | 0.48                       | 23.7          | 2400           |

<sup>a</sup>  $\sigma = W_b / 4$ , <sup>b</sup>  $N = ( \text{Distance} / \sigma )^2$
